# Supplementary material for: Completeness of radiosonde humidity observations based on the Integrated Global Radiosonde Archive
Source: Copernicus journal article supplement (doi:10.5194/essd-11-603-2019), 2019-05-09
Supplement: Supplementary file 1 [file essd-11-603-2019-supplement.zip]

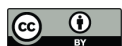

## *Supplement of*

# **Completeness of radiosonde humidity observations based on the Integrated Global Radiosonde Archive**

**António P. Ferreira et al.**

*Correspondence to:* António P. Ferreira ([ap.ferreira@uvigo.es](mailto:ap.ferreira@uvigo.es))

- [essd-11-603-2019-supplement-title-page.pdf](#)
- [Table S1.pdf](#)
- [Table S2.pdf](#)

The copyright of individual parts of the supplement might differ from the CC BY 4.0 License.
